# Supplementary material for: The isothermal crystallization kinetics of poly(ethylene glycol)-block-poly(l-lactide) block copolymers (PEG–PLLA): effects of the block lengths of PEG and PLLA
Source: Royal Society of Chemistry journal article supplement (doi:10.1039/d2ce00448h), 2022-01-01
Supplement: d2ce00448h1.pdf [file d2ce00448h1.pdf]

**Supplementary information for “The isothermal crystallization kinetic of poly(ethylene glycol)-*block*-poly(L-lactide) block copolymers (PEG-PLLA): Effect of block lengths of PEG and PLLA”**

Yun Chen,<sup>a</sup> Liying Wang,<sup>a</sup> Weishuo Chen,<sup>a</sup> Channa Zhong,<sup>a</sup> Shuangcheng Li,<sup>a</sup> Jun Shao,<sup>\*a, b</sup> Gao Li<sup>c</sup> and Haoqing Hou<sup>\*\*a, b</sup>

<sup>a</sup> College of Chemistry & Chemical Engineering and Nanofiber Engineering Center of Jiangxi Province, Jiangxi Normal University, Nanchang, 330022, China.

<sup>b</sup> Key Lab of Fluorine and Silicon for Energy Materials and Chemistry of Ministry of Education, Jiangxi Normal University, Nanchang, 330022, China.

<sup>c</sup> Key Laboratory of Polymer Ecomaterials, Changchun Institute of Applied Chemistry, Chinese Academy of Sciences, Changchun 130022, China.

**Table S1.** The lnK,  $t_{1/2}$  and n values calculated from DSC.

| specimen                              | $T_c$ (°C) | lnK   | $t_{1/2}$ (min) | n    |
|---------------------------------------|------------|-------|-----------------|------|
| PLLA <sub>21</sub>                    | 90         | -4.50 | 5.61            | 2.26 |
|                                       | 100        | -3.60 | 2.25            | 3.38 |
|                                       | 110        | -1.42 | 1.17            | 3.24 |
|                                       | 120        | -3.90 | 4.13            | 2.39 |
|                                       | 130        | -7.61 | 10.42           | 3.01 |
|                                       | 140        | -8.94 | 18.47           | 2.91 |
| PLLA <sub>43</sub>                    | 90         | -5.08 | 8.36            | 2.19 |
|                                       | 100        | -3.32 | 3.09            | 2.45 |
|                                       | 110        | -1.93 | 1.53            | 3.34 |
|                                       | 120        | -4.19 | 5.36            | 2.31 |
|                                       | 130        | -7.19 | 8.56            | 3.11 |
| PLLA <sub>73</sub>                    | 90         | -5.27 | 6.87            | 2.49 |
|                                       | 100        | -4.01 | 3.52            | 2.71 |
|                                       | 110        | -3.49 | 3.11            | 2.45 |
|                                       | 120        | -4.98 | 4.87            | 2.93 |
|                                       | 130        | -7.34 | 8.79            | 3.05 |
| MPEG <sub>4</sub> -PLLA <sub>22</sub> | 70         | -4.87 | 1.67            | 5.32 |
|                                       | 80         | -1.24 | 0.77            | 5.61 |
|                                       | 90         | 0.10  | 0.61            | 5.32 |
|                                       | 100        | 0.32  | 0.63            | 4.57 |

|                                       |     |        |       |       |
|---------------------------------------|-----|--------|-------|-------|
|                                       | 110 | -1.8   | 1.21  | 3.73  |
|                                       | 120 | -4.02  | 2.58  | 3.42  |
|                                       | 130 | -6.54  | 6.10  | 3.29  |
|                                       | 140 | -14.40 | 19.88 | 4.27  |
|                                       | 70  | -14.23 | 5.22  | 5.95  |
|                                       | 80  | -5.57  | 1.88  | 5.46  |
|                                       | 90  | -2.26  | 0.96  | 5.36  |
|                                       | 100 | -0.63  | 0.81  | 4.25  |
| MPEG <sub>4</sub> -PLLA <sub>42</sub> | 110 | -2.31  | 1.37  | 3.74  |
|                                       | 120 | -4.81  | 3.34  | 3.32  |
|                                       | 130 | -8.15  | 9.50  | 3.30  |
|                                       | 140 | -9.08  | 21.54 | 2.83  |
|                                       | 70  | -28.63 | 6.80  | 9.97  |
|                                       | 80  | -8.82  | 2.35  | 6.48  |
|                                       | 90  | -3.55  | 1.44  | 4.57  |
|                                       | 100 | -1.63  | 1.09  | 3.77  |
| MPEG <sub>4</sub> -PLLA <sub>62</sub> | 110 | -2.31  | 1.45  | 3.56  |
|                                       | 120 | -4.77  | 3.68  | 3.50  |
|                                       | 130 | -7.27  | 8.98  | 3.06  |
|                                       | 140 | -9.61  | 32.73 | 2.60  |
|                                       | 70  | 11.01  | 0.14  | 14.21 |
| PEG <sub>4</sub> -PLLA <sub>19</sub>  | 80  | 13.67  | 0.11  | 13.27 |

|                                       |     |        |       |       |
|---------------------------------------|-----|--------|-------|-------|
|                                       | 90  | 9.37   | 0.15  | 10.09 |
|                                       | 100 | 6.51   | 0.22  | 7.87  |
|                                       | 110 | 1.15   | 0.51  | 5.10  |
|                                       | 120 | -2.63  | 1.45  | 4.08  |
|                                       | 130 | -6.68  | 6.96  | 3.11  |
|                                       | 70  | -13.99 | 4.09  | 6.77  |
|                                       | 80  | -3.63  | 1.76  | 3.99  |
|                                       | 90  | -0.79  | 0.83  | 4.35  |
|                                       | 100 | 1.06   | 0.51  | 5.21  |
| PEG <sub>4</sub> -PLLA <sub>40</sub>  | 110 | -1.14  | 0.96  | 4.07  |
|                                       | 120 | -4.25  | 2.39  | 3.69  |
|                                       | 130 | -8.51  | 8.38  | 3.57  |
|                                       | 140 | -6.90  | 32.40 | 1.88  |
|                                       | 70  | -33.77 | 13.56 | 9.53  |
|                                       | 80  | -9.07  | 6.10  | 4.24  |
|                                       | 90  | -4.77  | 2.46  | 3.91  |
|                                       | 100 | -2.457 | 1.32  | 4.03  |
| PEG <sub>4</sub> -PLLA <sub>67</sub>  | 110 | -3.397 | 1.92  | 3.60  |
|                                       | 120 | -5.56  | 4.92  | 3.09  |
|                                       | 130 | -9.57  | 19.66 | 2.98  |
|                                       | 140 | -8.97  | 40.30 | 2.29  |
| PEG <sub>10</sub> -PLLA <sub>19</sub> | 70  | -0.38  | 0.44  | 9.26  |

|                                       |     |        |       |       |
|---------------------------------------|-----|--------|-------|-------|
|                                       | 80  | 1.28   | 0.42  | 7.65  |
|                                       | 90  | -0.80  | 0.74  | 4.96  |
|                                       | 100 | -1.05  | 0.86  | 4.33  |
|                                       | 110 | -2.88  | 1.69  | 3.51  |
|                                       | 120 | -5.47  | 4.20  | 3.20  |
|                                       | 70  | -2.37  | 0.89  | 6.00  |
|                                       | 80  | 2.54   | 0.52  | 10.78 |
|                                       | 90  | -1.84  | 0.92  | 4.98  |
|                                       | 100 | -2.11  | 1.19  | 4.03  |
| PEG <sub>10</sub> -PLLA <sub>40</sub> | 110 | -2.86  | 1.69  | 3.52  |
|                                       | 120 | -4.52  | 3.17  | 3.36  |
|                                       | 130 | -6.66  | 6.08  | 3.35  |
|                                       | 140 | -9.61  | 36.11 | 2.56  |
|                                       | 70  | -15.91 | 4.09  | 7.46  |
|                                       | 80  | 0.01   | 2.65  | 6.58  |
|                                       | 90  | -3.11  | 2.09  | 3.93  |
|                                       | 100 | -3.09  | 1.81  | 3.58  |
| PEG <sub>10</sub> -PLLA <sub>69</sub> | 110 | -3.61  | 2.10  | 3.59  |
|                                       | 120 | -5.67  | 4.39  | 3.31  |
|                                       | 130 | -7.26  | 10.90 | 2.79  |
|                                       | 140 | -11.58 | 33.38 | 3.06  |
| PEG <sub>20</sub> -PLLA <sub>20</sub> | 60  | 10.30  | 0.13  | 20.26 |

|                                       |     |       |       |       |
|---------------------------------------|-----|-------|-------|-------|
|                                       | 70  | 8.32  | 0.18  | 11.73 |
|                                       | 80  | 6.29  | 0.22  | 9.21  |
|                                       | 90  | 3.90  | 0.30  | 6.86  |
|                                       | 100 | -0.80 | 0.82  | 4.09  |
|                                       | 110 | -3.95 | 2.93  | 3.05  |
|                                       | 60  | 2.62  | 0.21  | 8.67  |
|                                       | 70  | 2.80  | 0.27  | 6.89  |
|                                       | 80  | 2.95  | 0.33  | 7.67  |
|                                       | 90  | 0.83  | 0.498 | 5.10  |
| PEG <sub>20</sub> -PLLA <sub>41</sub> | 100 | 0.87  | 0.56  | 4.45  |
|                                       | 110 | -1.76 | 1.37  | 3.10  |
|                                       | 120 | -3.65 | 2.86  | 2.93  |
|                                       | 130 | -7.55 | 8.19  | 3.19  |
|                                       | 60  | -5.52 | 1.85  | 5.45  |
|                                       | 70  | -1.83 | 0.87  | 5.44  |
|                                       | 80  | 0.01  | 0.55  | 6.58  |
|                                       | 90  | -1.03 | 0.80  | 4.70  |
| PEG <sub>20</sub> -PLLA <sub>62</sub> | 100 | -0.85 | 0.84  | 4.26  |
|                                       | 110 | -2.61 | 1.42  | 3.99  |
|                                       | 120 | -5.05 | 3.35  | 3.48  |
|                                       | 130 | -9.11 | 14.45 | 3.12  |
|                                       | 140 | -6.58 | 26.47 | 1.90  |

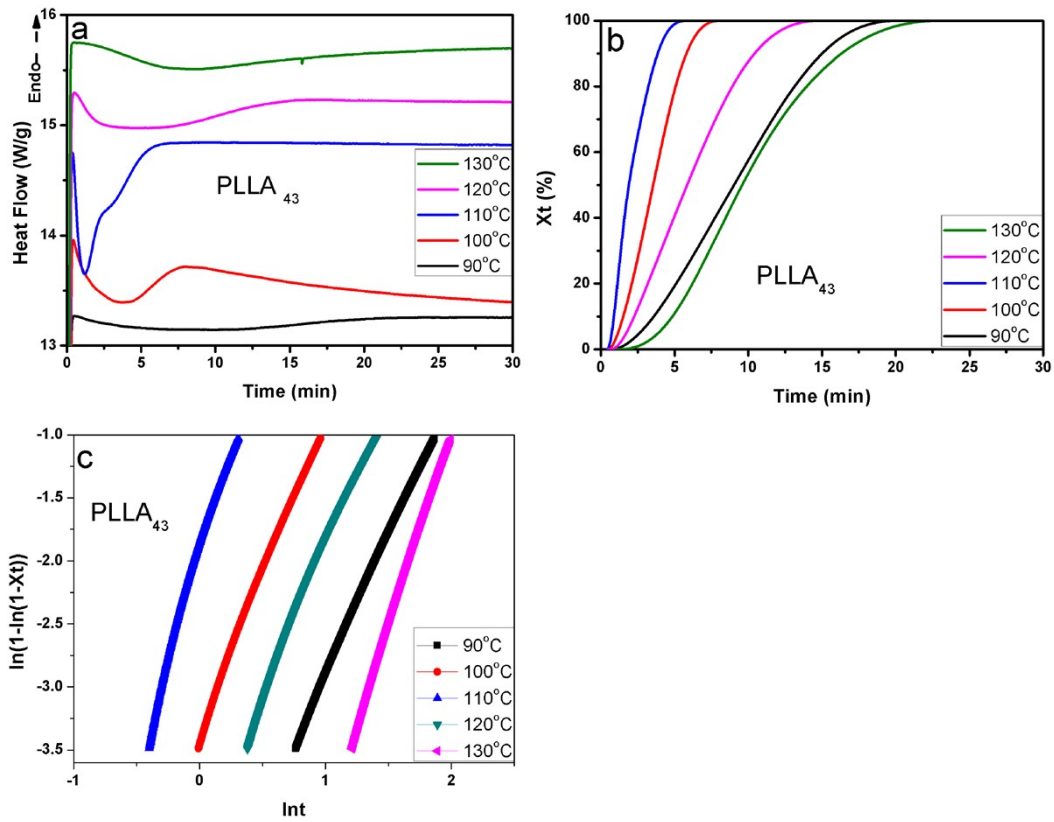

**Fig. S1.** (a) The isothermal thermograms, (b) the relative crystallinity as a function of crystallization time (t), and (c) the plots of  $\ln[-\ln(1-X(t))]$  versus  $\ln(t)$  of PLLA<sub>43</sub> at various crystallization temperatures.

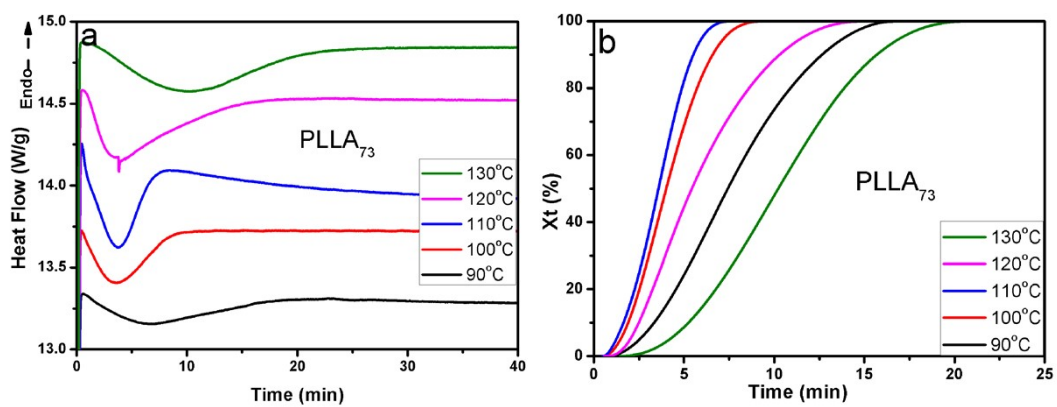

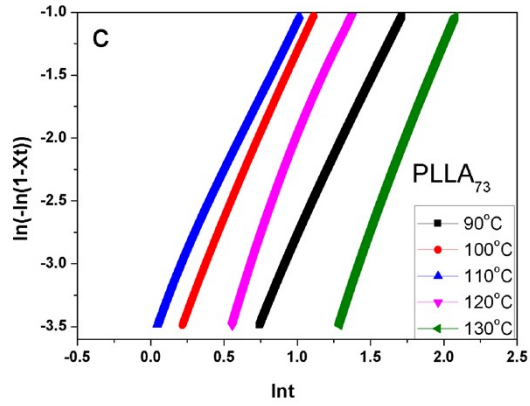

**Fig. S2.** (a) The isothermal thermograms, (b) the relative crystallinity as a function of crystallization time ( $t$ ), and (c) the plots of  $\ln[-\ln(1-X(t))]$  versus  $\ln(t)$  of  $\text{PLLA}_{73}$  at various  $T_c$ s.

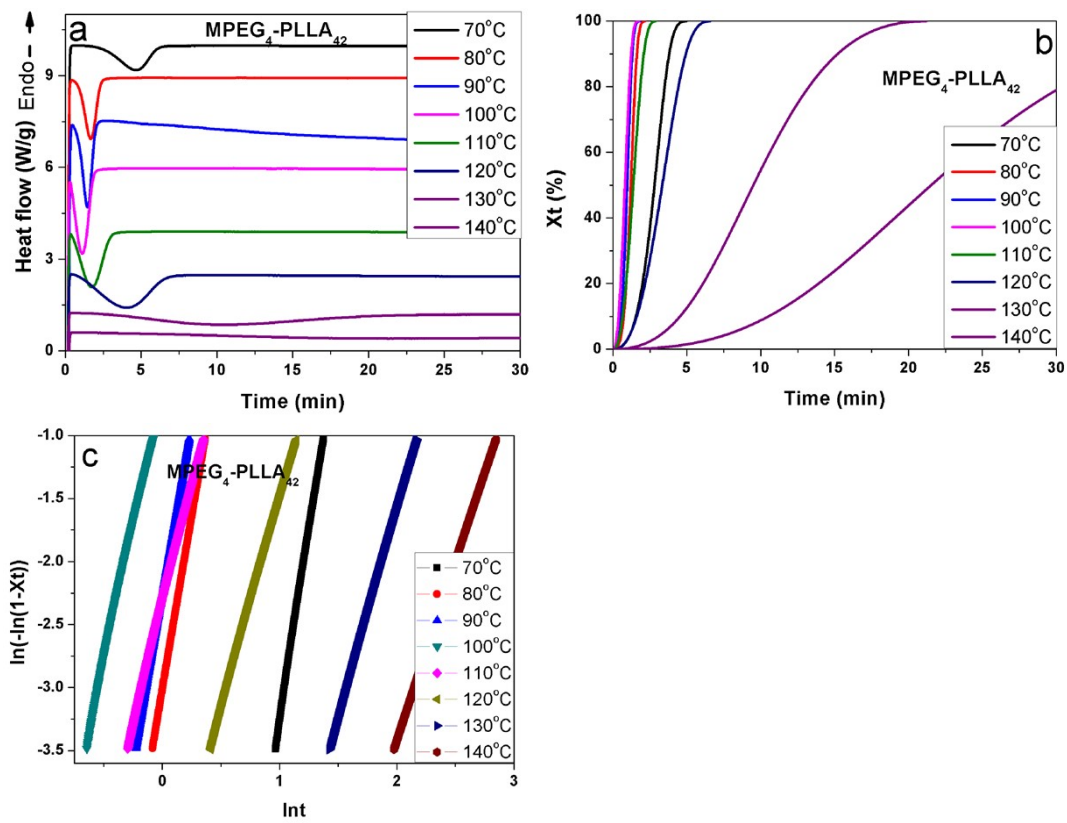

**Fig. S3.** The isothermal DSC thermograms (a), relative crystallinity curves (b), and the  $\ln[-\ln(1-X(t))]$  versus  $\ln(t)$  (c) of  $\text{MPEG}_4\text{-PLLA}_{42}$ .



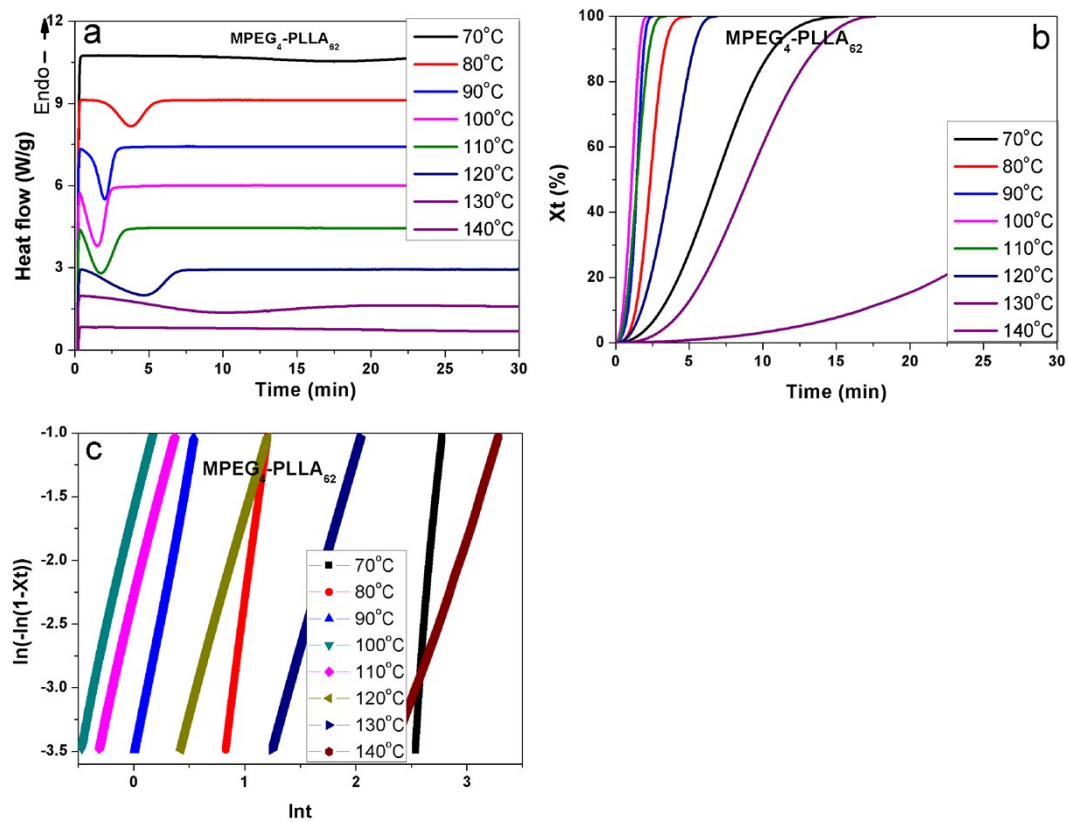

**Fig. S4.** The isothermal DSC thermograms (a), relative crystallinity curves (b), and the  $\ln[-\ln(1-X(t))]$  versus  $\ln t$  (c) of MPEG<sub>4</sub>-PLLA<sub>62</sub>.

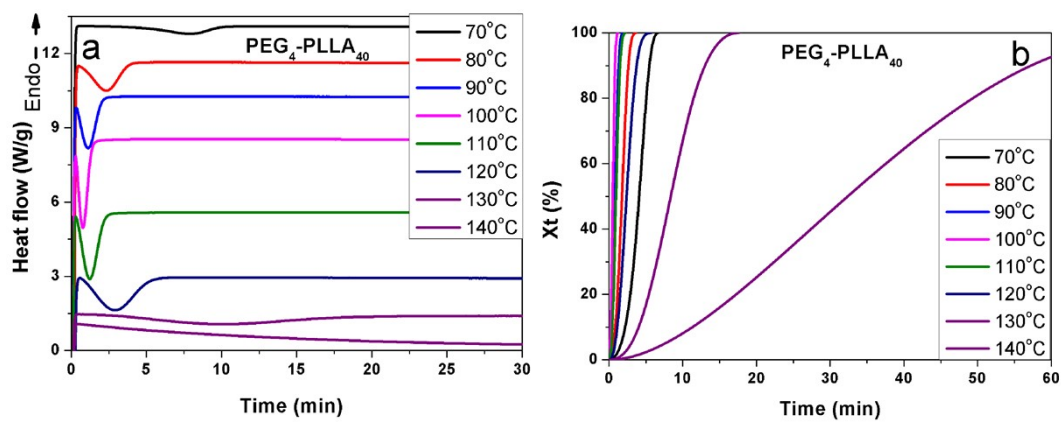

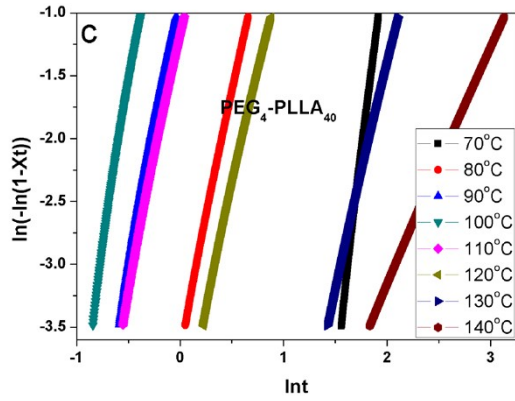

**Fig. S5.** The isothermal crystallization curves (a), relative crystallinity curves (b), and the  $\ln[-\ln(1-X(t))]$  versus  $\ln t$  (c) of PEG<sub>4</sub>-PLLA<sub>40</sub> for different  $T_c$ s.

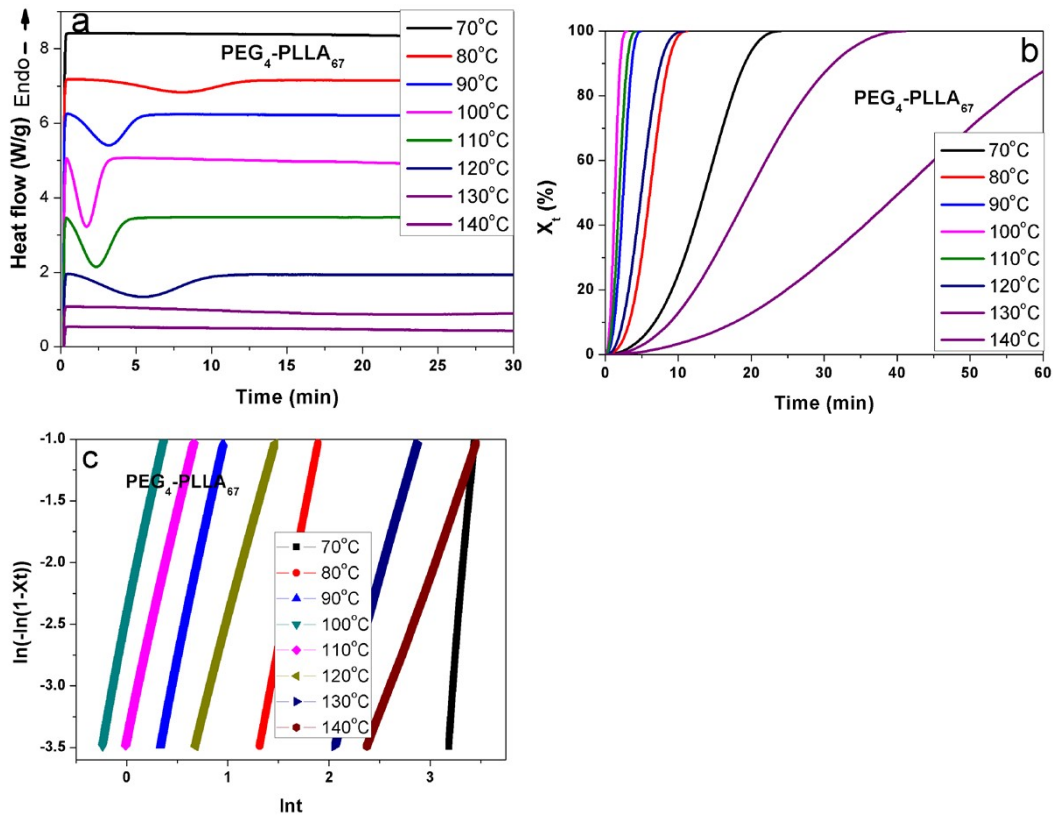

**Fig. S6.** The isothermal crystallization curves (a), relative crystallinity curves (b), and the  $\ln[-\ln(1-X(t))]$  versus  $\ln t$  (c) of PEG<sub>4</sub>-PLLA<sub>67</sub> for different temperatures.

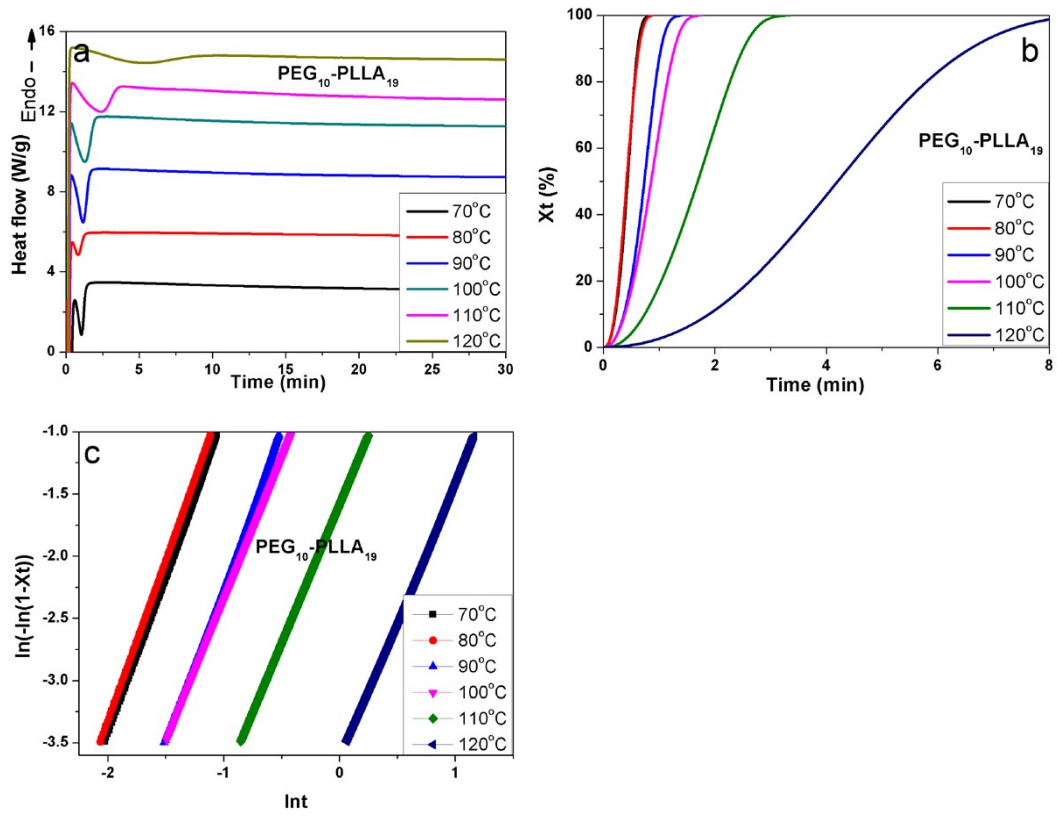

**Fig. S7.** The isothermal crystallization curves (a), relative crystallinity curves (b), and the  $\ln[-\ln(1-X(t))]$  versus  $\ln t$  of PEG<sub>10</sub>-PLLA<sub>19</sub> (c) for different  $T_c$ s.

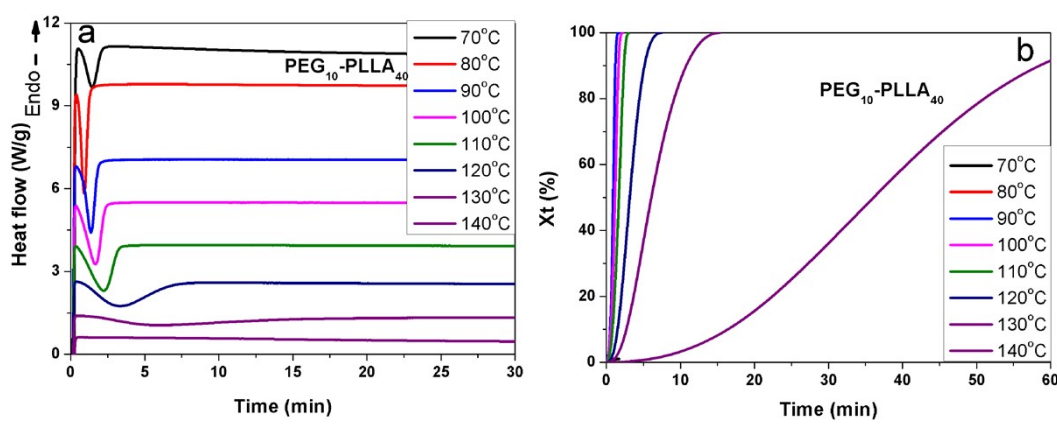

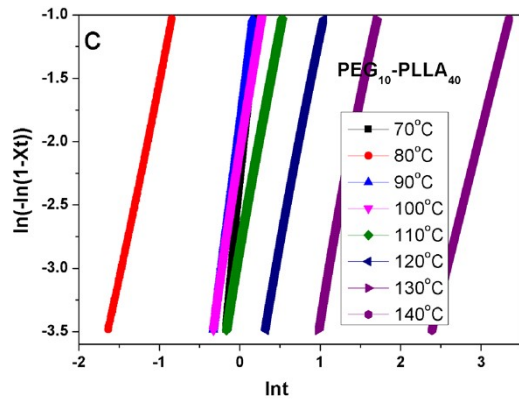

**Fig. S8.** The isothermal crystallization curves (a), relative crystallinity curves (b), and the  $\ln[-\ln(1-X(t))]$  versus  $\ln t$  (c) of PEG<sub>10</sub>-PLLA<sub>40</sub> for different temperatures.

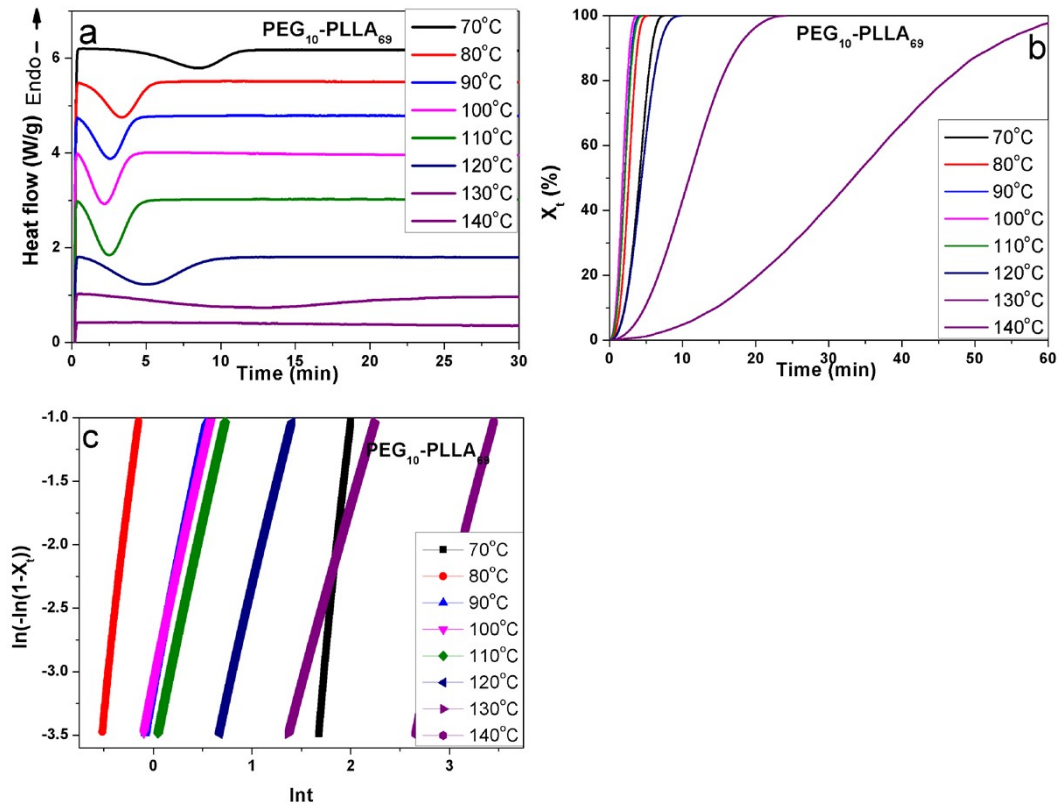

**Fig. S9.** The isothermal crystallization curves (a), relative crystallinity curves (b), and the  $\ln[-\ln(1-X(t))]$  versus  $\ln t$  (c) of PEG<sub>10</sub>-PLLA<sub>69</sub> for different temperatures.

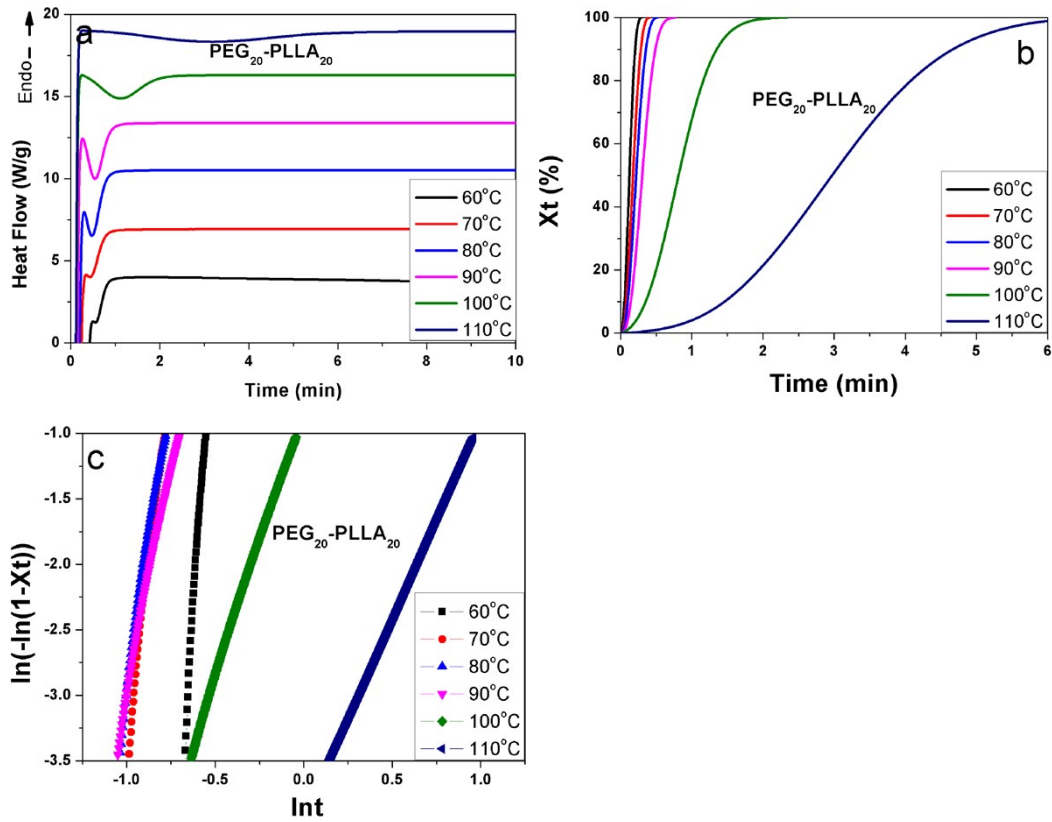

**Fig. S10.** The isothermal crystallization curves (a), relative crystallinity curves (b), and the  $\ln[-\ln(1-X(t))]$  versus  $\ln t$  (c) of PEG<sub>20</sub>-PLLA<sub>20</sub> for different temperatures.

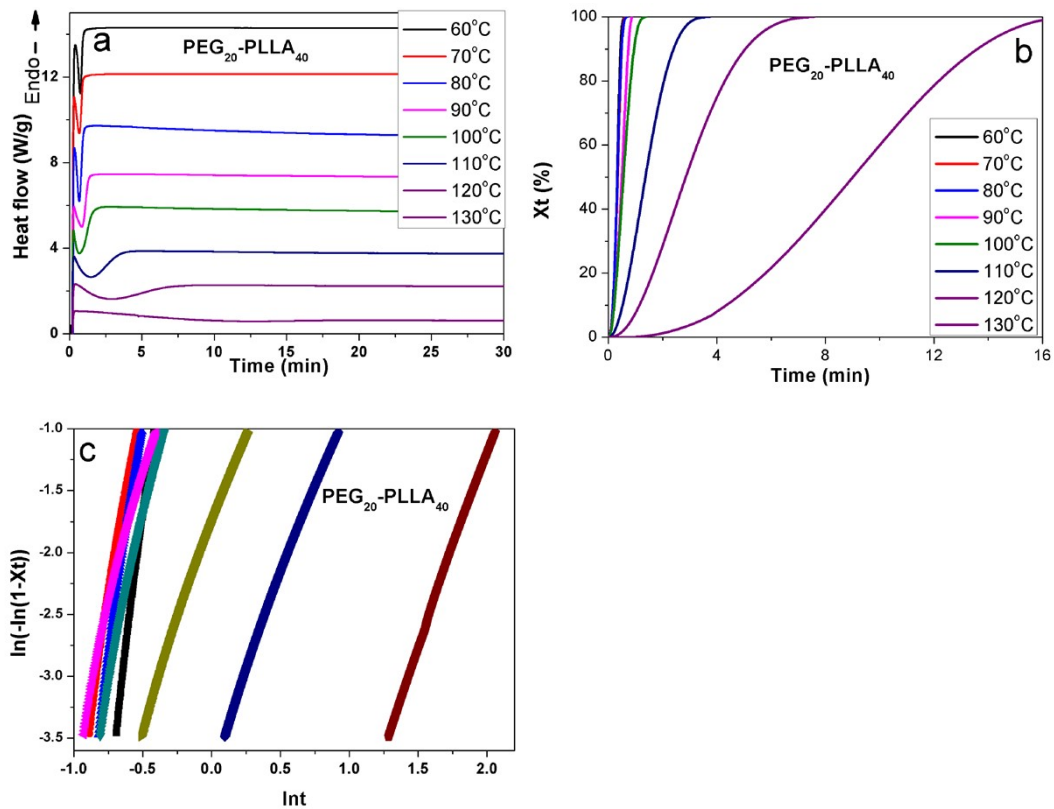

**Fig. S11.** The isothermal crystallization curves (a), relative crystallinity curves (b), and the  $\ln[-\ln(1-X(t))]$  versus  $\ln t$  (c) of PEG<sub>20</sub>-PLLA<sub>40</sub> for different temperatures.

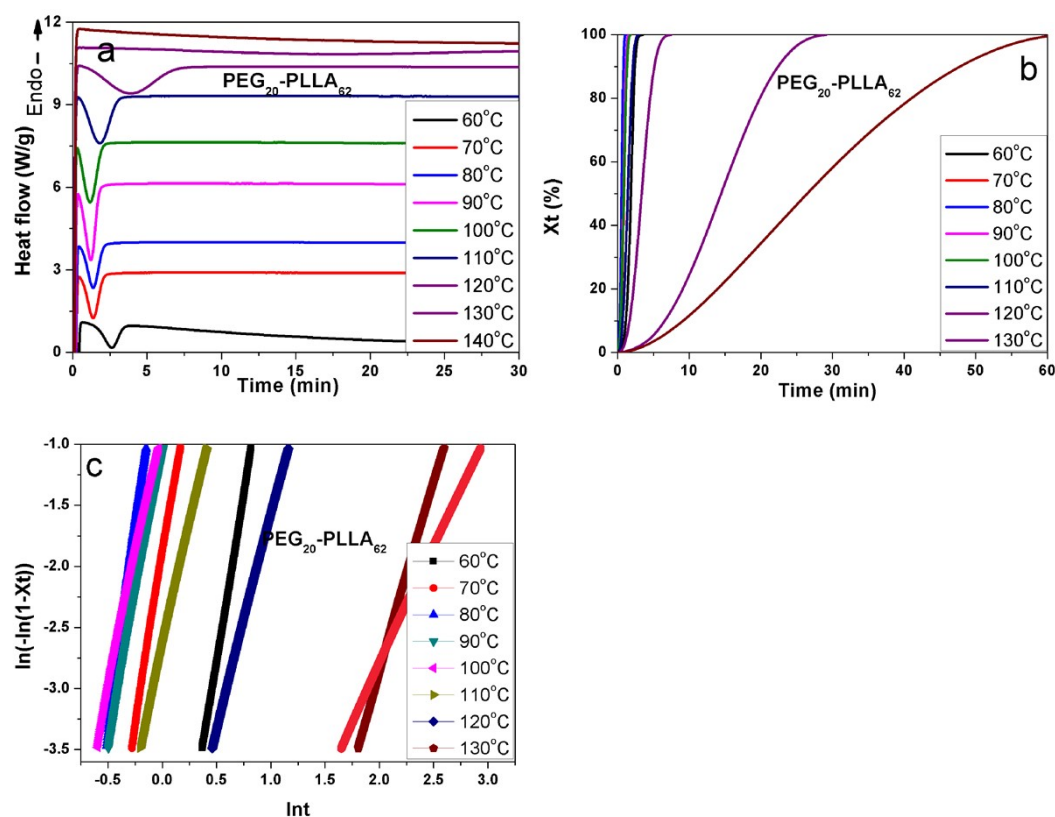

**Fig. S12.** The isothermal crystallization curves (a), relative crystallinity curves (b), and the  $\ln[-\ln(1-X(t))]$  versus  $\ln t$  (c) of PEG<sub>20</sub>-PLLA<sub>62</sub> for different temperatures.

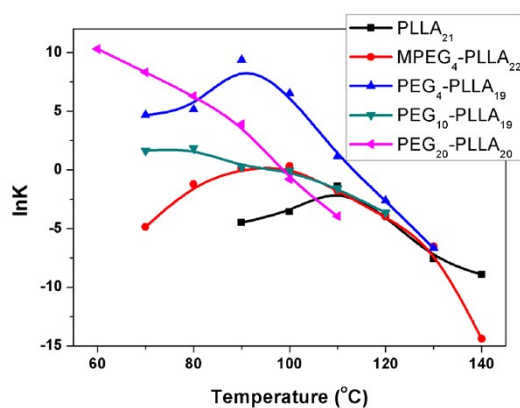

**Fig. S13.** The  $\ln K$  for PLLA<sub>21</sub>, MPEG<sub>4</sub>-PLLA<sub>22</sub>, PEG<sub>4</sub>-PLLA<sub>19</sub>, PEG<sub>10</sub>-PLLA<sub>19</sub> and PEG<sub>20</sub>-PLLA<sub>20</sub>.

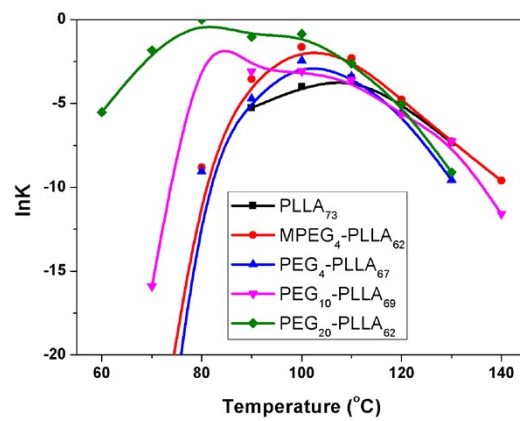

**Fig. S14.** The  $\ln K$  for PLLA<sub>73</sub>, MPEG<sub>4</sub>-PLLA<sub>62</sub>, PEG<sub>4</sub>-PLLA<sub>67</sub>, PEG<sub>10</sub>-PLLA<sub>69</sub> and PEG<sub>20</sub>-PLLA<sub>62</sub>.
